# Supplementary material for: Avian Community Structure as a Function of Season, Habitat Type, and Disturbance, in Mole National Park, Northern Region (Ghana)
Source: Hindawi journal article supplement (doi:10.1155/2018/2045629), 2018-06-19
Supplement: f1 [file 2045629.f1.docx]

**APPENDICES**

Appendix 1: List of bird species identified and their IUCN status, with respect to the IUCN global “*Red List*” database. LC = Least concern; NT = Near threatened; CR = Critical threatened; VU = Vulnerable (IUCN, 2011)

| **Scientific Name** | **Common Name** | **Family** | **IUCN Status** |
| --- | --- | --- | --- |
| **Hornbills** |  |  |  |
| *Bucorvus abyssinicus* | Abyssinian ground hornbill | Bucerotidae | LC |
| *Tockus nasutus* | African grey hornbill | Bucerotidae | LC |
| *Tockus erythrorhynchus* | Red-billed hornbill | Bucerotidae | LC |
| **Rollers** |  |  |  |
| *Coracias abyssinicus* | Abyssinian roller | Coraciidae | LC |
| *Eurystomus glaucurus* | Broad-billed roller | Coraciidae | LC |
| **Orioles** |  |  |  |
| *Oriolus auratus* | African golden oriole | Oriolidae | LC |
| **Pigeons and doves** |  |  |  |
| *Treron calvus* | African green pigeon | Columbidae | LC |
| *Turtur abyssinicus* | Black-billed wood dove | Columbidae | LC |
| *Treron waalia* | Bruce's pigeon | Columbidae | LC |
| *Spilopelia senegalensis* | Laughing dove | Columbidae | LC |
| *Oena capensis* | Namaqua dove | Columbidae | LC |
| *Streptopelia semitorquata* | Red-eyed dove | Columbidae | LC |
| *Columba guinea* | Speckled pigeon | Columbidae | LC |
| *Streptopelia vinacea* | Vinaceous dove | Columbidae | LC |
| **Coots** |  |  |  |
| *Actophilornis africanus* | African jacana | Jacanidae | LC |
| **Warblers** |  |  |  |
| *Melocichia mentalis* | African moustached warbler | Macrosphenidae | LC |
| *Phylloscopus trochilus* | Willow warbler(Migrant) | Phylloscopidae | LC |
| *Hypergerus atriceps* | Oriole warbler | Cisticolidae | LC |
| **Swifts** |  |  |  |
| *Cypsiurus parvus* | African palm swift | Apodidae | LC |
| **Flycatchers** |  |  |  |
| *Terpsiphone viridis* | African paradise flycatcher | Monarchidae | LC |
| *Myioparus plumbeus* | Lead-coloured flycatcher | Muscicapidae | LC |
| *Melaenornis edolioides* | Northern black flycatcher | Muscicapidae | LC |
| *Melaenornis pallidus* | Pale flycatcher | Muscicapidae | LC |
| *Ficedula hypoleuca* | Pied flycatcher | Muscicapidae | LC |
| *Muscicapa aquatica* | Swamp flycatcher | Muscicapidae | LC |
| **Plovers and Lapwings** |  |  |  |
| *Vanellus senegallus* | African-wattled lapwing | Charadriidae | LC |
| *Charadrius forbesi* | Forbe's plover | Charadriidae | LC |
| *Vanellus spinosus* | Spur-winged lapwing | Charadriidae | LC |
| **Finches** |  |  |  |
| *Lagonosticta rufopicta* | Bar-breasted firefinch | Estirldidae | LC |
| *Lagonosticta senegala* | Red-billed firefinch | Estrildidae | LC |
| *Uraeginthus bengalus* | Red-cheeked cordon-bleu | Estrildidae | LC |
| *Spermestes cucullata* | Bronze manikin | Estrildidae | LC |
| *Estrilda caerulescens* | Lavendar waxbill | Estrildidae | LC |
| *Crithagra mozambicus* | Yellow-fronted canary | Fringillidae | LC |
| **Swallows and martins** |  |  |  |
| *Hirundo rustica* | Barn swallow | Hirundinidae | LC |
| *Hirundo lucida* | Red-chested swallow | Hirundinidae | LC |
| *Hirundo smithii* | Wire-tailed swallow | Hirundinidae | LC |
| **Vutltures, Eagles, Hawks** |  |  |  |
| *Terathopius ecaudatus* | Bateleur eagle | Accipitridae | NT |
| *Milvus migrans* | Black kite | Accipitridae | LC |
| *Necrosyrtes monachus* | Hooded vulture | Accipitridae | CR |
| *Gypohierax angolensis* | Palmnut vulture | Accipitridae | LC |
| *Gyps africanus* | White-backed vulture | Accipiridae | CR |
| *Trigonoceps occipitalis* | White-headed vulture | Accipitridae | CR |
| *Buteo jamaicensis* | Falcon/Hawk | Accipitridae | LC |
| *Accipiter badius* | Shikra | Accipitridae | LC |
| **Sunbirds** |  |  |  |
| *Cinnyris pulchellus* | Beautiful sunbird | Nectariniidae | LC |
| *Hedydipna platurus* | Pygymy sunbird | Nectariniidae | LC |
| *Chalcomitra senegalensis* | Scarlet-chested sunbird | Nectariniidae | LC |
| **Woodpeckers** |  |  |  |
| *Lybius dubius* | Bearded barbet | Lybiidae | LC |
| **Crakes** |  |  |  |
| *Amaurornis flavirostra* | Black crake | Rallidae | LC |
| **Wood hoopoes** |  |  |  |
| *Rhinopomastus aterrimus* | Black Scimitarbill | Phoeniculidae | LC |
| *Phoeniculus purpureus* | Green wood hoopoe | Phoeniculidae | LC |
| **Babblers** |  |  |  |
| *Pellorneum negrocapitatum* | Black-capped babbler | Pellorneidae | LC |
| *Turdoides plebejus* | Brown babbler | Leiotrichidae | LC |
| **Heron, bitterns, egrets** |  |  |  |
| *Nycticorax nycticorax* | Black-crowned night heron | Ardeidae | LC |
| *Ardea melanocephala* | Black-headed heron | Ardeidae | LC |
| *Bubulcus ibis* | Cattle egret | Ardeidae | LC |
| *Bustorides striata* | Green-backed heron | Ardeidae | LC |
| *Ardeola ralloides* | Squacco heron | Ardeidae | LC |
| *Ardea cinerea* | Grey heron | Ardeidae | LC |
| *Egretta garzetta* | Little egret | Ardeidae | LC |
| **Shrikes** |  |  |  |
| *Tchagra australis* | Black-crowned tchagra | Malaconotidae | LC |
| *Nilaus afer* | Brubru | Malaconotidae | LC |
| *Malaconotidae blanchoti* | Grey-headed bush-shrike | Malaconotidae | LC |
| *Laniarius barbarus* | Yellow-crowned gonolek | Malconotidae | LC |
| *Campephaga phoenicea* | Red-shouldered cucooshrike | Campephegidae | LC |
| *Chlorophoneus sulfureopectus* | Sulphur-breasted bush shrike | Malaconotidae | LC |
| *Corvinella corvina* | Yellow-billed shrike | Laniidae | LC |
| **Kingfishers** |  |  |  |
| *Halcyon malimbica* | Blue-breasted kingfisher | Alcedinidae | LC |
| *Megaceryle maxima* | Giant kingfisher | Alcedinidae | LC |
| *Corythornis cristatus* | Malachite kingfisher | Alcedininae | LC |
| *Halcyon leucocephala* | Grey-headed kingfisher | Alcedinidae | LC |
| *Ceryle rudis* | Pied kingfisher | Alcedinidae | LC |
| *Alcedo quadribrachys* | Shining blue kingfisher | Alcedinidae | LC |
| **Bishops** |  |  |  |
| *Euplectes Hordeaceus* | Black-winged bishop | Ploceidae | LC |
| *Euplectes franciscanus* | Northern red bishop | Ploceidae | LC |
| **Sparrows** |  |  |  |
| *Petronia denata* | Bush petronia | Passeridea | LC |
| *Plocepasser superciliosus* | Chestnut-crowned sparrow weaver | Passeridae | LC |
| *Passer griseus* | Northern grey-headed sparrow | Passeridae | LC |
| **Larks** |  |  |  |
| *Eremopterix australis* | Chestnut-crowned sparrow lark | Alaudidae | LC |
| *Galerida modesta* | Sun Larks | Alaudidae | LC |
| *Mirafra cantillans* | Singing bush lark | Alaudidae | LC |
| **Buntings** |  |  |  |
| *Emberiza tahapisi* | Cinnamon-breasted rock bunting | Emberizidae | LC |
| **Bulbuls** |  |  |  |
| *Pycnonotus barbatus* | Common garden bulbul | Pycnonotidae | LC |
| **Bustards** |  |  |  |
| *Neotis denhami* | Denham’s bustard | Otidae | NT |
| **Sand pipers and Allies** |  |  |  |
| *Actistis hypoleucos* | Common sandpiper | Scolopacidae | LC |
| **Pheasants and patridges** |  |  |  |
| *Pternistis bicalcaratus* | Double-spurred francolin | Phasianidae | LC |
| **Woodpeckers** |  |  |  |
| *Campethera punctuligera* | Fine-spotted wood pecker | Picidae | LC |
| *Dendropicos goertae* | Grey woodpecker | Picidae | LC |
| *Campethera maculosa* | Little green wood pecker | Picidae | LC |
| **Drongos** |  |  |  |
| *Dicrurus adsimilis* | Fork-tailed drongo | Dicrurudae | LC |
| **Snadgrouse** |  |  |  |
| *Pterocles quadricinctus* | Four-banded sandgrouse | Pteroclididae | LC |
| **Starlings** |  |  |  |
| *Lamprotornis chalybaeus* | Greater blue-eared glossy starling | Sturnidae | LC |
| *Lamprotornis purpureus* | Purple glossy starling | Sturnidae | LC |
| *Lamprotornis caudatus* | Long-tailed glossy starling | Sturnidae | LC |
| **Honey guides** |  |  |  |
| *Indicator indicator* | Greater honey guide | Indicatoridae | LC |
| *Indicator minor* | Lesser honey guide | Indictatoridae | LC |
| **Sandpipers and allies** |  |  |  |
| *Tringa ochropus* | Green sandpiper | Scolopacidae | LC |
| **Cisticolas** |  |  |  |
| *Camaroptera brevicaudata* | Grey-backed camaroptera | Cisticolidae | LC |
| **Ibises** |  |  |  |
| *Bostrychia hagedash* | Hadada Ibis | Threskiornithidae | LC |
| **Hamerkops** |  |  |  |
| *Scopus umbretta* | Hamerkop | Scopidae | LC |
| **Guinea fowl** |  |  |  |
| *Numida meleagris* | Helmeted guinea fowl | Numididae | LC |
| **Weavers** |  |  |  |
| *Ploceus luteolus* | Little weaver | Ploceidae | LC |
| *Anaplectes rubriceps* | Red-headed weaver | Ploceidae | LC |
| *Euplectes macroura* | Yellow-mantled widowbird | Ploceidae | LC |
| *Ploceus cucullatus* | Village weaver | Ploceidae | LC |
| **Buzzards** |  |  |  |
| *Kaupifalco monogrammicus* | Lizard buzzard | Acciptridae | LC |
| **Nightjars** |  |  |  |
| *Caprimulgus climacurus* | Long-tailed nightjar | Caprimulgidae | LC |
| **Bee-eaters** |  |  |  |
| *Merops nubicus* | Northern carmine bee eater | Meropidae | LC |
| *Merops bulocki* | Red-throated bee eater | Meropidae | LC |
| *Merops albicollis* | White-throated bee eater | Meropidae | LC |
| *Merops hirundineus* | Swallow-tailed bee-eater | Meropidae | LC |
| **Crombecs** |  |  |  |
| *Sylvietta brachyura* | Northern crombec | Macrosphenidae | LC |
| **Thick-knees** |  |  |  |
| *Burhinus senegalensis* | Senegal Thick-knee | Burhinidae | LC |
| *Burhinus capensis* | Spotted Thick-knee | Burhinidae | LC |
| *Burhinus vermiculatus* | Water thick-knee | Burhinidae | LC |
| **Puffbacks** |  |  |  |
| *Dryoscopus gambensis* | Northern puffback | Malaconotidae | LC |
| **Owls** |  |  |  |
| *Bubo africanus* | Pearl-spotted owlet | Strigidae | LC |
| **Whydahs** |  |  |  |
| *Vidua macroura* | Pin-tailed whydah | Viduidae | LC |
| **Pytilia and twinspots** |  |  |  |
| *Pytilia phoenicoptera* | Red-winged pytilia | Estrildidae | LC |
| **Parrots** |  |  |  |
| *Psittacula krameri* | Rose-ringed parakeet | Psittaculidae | LC |
| **Batises** |  |  |  |
| *Batis senegalensis* | Senegal batis | Platysteiridae | LC |
| **Cuckoos and coucals** |  |  |  |
| *Centropus senegalensis* | Senegal coucal | Cuculidae | LC |
| **Erememolas** |  |  |  |
| *Eremomela pusilla* | Senegal erememola | Cisticolidae | LC |
| **Parrots** |  |  |  |
| *Poicephalus senegalus* | Senegal parrot | Psittacidae | LC |
| **Chats** |  |  |  |
| *Cossypha niveicapilla* | Snowy-crowned robin chat | Muscicarpidae | LC |
| **Ducks and Geese** |  |  |  |
| *Plectropterus gambensis* | Spur-winged goose | Anatidae | LC |
| *Dendrocygna viduata* | White-faced whistling ducks | Anatidae | LC |
| **Turacos** |  |  |  |
| *Musophaga violacea* | Violet turaco | Musophagidae | LC |
| *Crinifer piscator* | Western grey plantain-eater | Musophagidae | LC |
| **Patridges** |  |  |  |
| *Ptilopachus petrosus* | Stone partridge | Odontophoridae | LC |
| **Prinias** |  |  |  |
| *Prinia subflava* | Tawny-flanked prinia | Cisticolidae | LC |
| **Indigo birds** |  |  |  |
| *Vidua chalybeata* | Village indigo bird | Viduidae | LC |
| **Thrushes** |  |  |  |
| *Turdus pelios* | West-african thrush | Turdidae | LC |
| **Storks** |  |  |  |
| *Ciconia ciconia* | White stock | Ciconidae | LC |
| **Cuckoos and coucals** |  |  |  |
| Coracina pectoralis | White-breasted cuckooshrike | Campephagidae | LC |
| **Tits** |  |  |  |
| *Melaniparus guineensis* | White-shouldered black tit | Paridae | LC |
| **Storks** |  |  |  |
| *Ciconia episcopus* | Woolly-necked stork | Ciconiidae | VU |
| **White-eyes** |  |  |  |
| *Zosterops nigrorum* | Yellow white eye | Zosteropidae | LC |
| **Barbets** |  |  |  |
| *Pogoniulus chrysoconus* | Yellow-fronted tinkerbird | Lybiidae | LC |
